# Supplementary material for: Depth-to-Bedrock Map of China at a Spatial Resolution of 100 Meters
Source: Copernicus journal article supplement (doi:10.5194/essd-2018-103), 2018-09-13
Supplement: Supplementary file 1 [file Supplement File A_Covariates List.xlsx]

## Sheet: Sheet1
NAME	DESCRIPTION	RESOLUTION	SOURCE	SELECTED
DEMMRG17	Land surface elevation	100	Institute of Industrial Sciences, The University of Tokyo	1
C30GLC15	Global land cover for year 2000and 2010 based on GlobCover30	30	National Geomatics Center of China (NGCC)	1
RTMUSG15	Rock type: based on the global lithology map	250	USGS Geosciences and Environmental Change Science Center (GECSC) based on the Global Lithological Map database v1.1 (GLiM, Hartmann and Moosdorf, 2012).	1
LFTUSG15	Landform class: based on the USGS's A New Map of Global Ecological Land Units.	250	USGS Geosciences and Environmental Change Science Center (GECSC)	1
LCEE10	ESA land cover map 2010	300	http://maps.elie.ucl.ac.be/CCI/viewer/download/ESACCI-LC-PUG-v2.5.pdf	1
BICUSG14	Bioclimatic zones; based on the USGS's A New Map of Global Ecological Land Units.	250	USGS Geosciences and Environmental Change Science Center (GECSC)	1
GFCLAN15	Landsat Band 3 (red) for year 2000	30	http://www.sciencemag.org/content/342/6160/850	1
TREL13	Global 30m Tree Cover (circa 2010)	30	http://www.sciencemag.org/content/342/6160/850	1
GSWGSW16	Occurrence probability	30	http://www.nature.com/nature/journal/vaop/ncurrent/full/nature20584.html	1
SFPESA12	Mean monthly snowfall prob. at 500 m (based on MODIS snow product) for January.	30	http://maps.elie.ucl.ac.be/CCI/viewer/download/ESACCI-LC-PUG-v2.5.pdf	1
BDTICM	Global depth to bedrock from soil grids	250	https://soilgrids.org	1
SED_DEP	Average soil and sedimentary deposit thickness	1000	the Oak Ridge National Laboratory (ORNL) Distributed Active Archive Center (DAAC)	1
TDMMOD3	Mean value the 8-day MODIS day-time LST time series data	1000	http://www.worldgrids.org/	1
TDSMOD3	Standard deviation of the 8-day MODIS day-time LST time series data	1000	http://www.worldgrids.org/	1
TDLMOD3	Minimum value of the 8-day MODIS day-time LST time series data	1000	http://www.worldgrids.org/	1
TDHMOD3	Maximum value of the 8-day MODIS day-time LST time series data	1000	http://www.worldgrids.org/	1
TNMMOD3	Mean value the 8-day MODIS night-time LST time series data	1000	http://www.worldgrids.org/	1
TNSMOD3	Standard deviation of the 8-day MODIS night-time LST time series data	1000	http://www.worldgrids.org/	1
TNLMOD3	Minimum value of the 8-day MODIS night-time LST time series data	1000	http://www.worldgrids.org/	1
TNHMOD3	Maximum value of the 8-day MODIS night-time LST time series data	1000	http://www.worldgrids.org/	1
TX1MOD3	Mean value of the 8-day MODIS day-time LST time series data for Dec/Jan	1000	http://www.worldgrids.org/	1
TX2MOD3	Mean value of the 8-day MODIS day-time LST time series data for Feb/Mar	1000	http://www.worldgrids.org/	1
TX3MOD3	Mean value of the 8-day MODIS day-time LST time series data for Apr/May	1000	http://www.worldgrids.org/	1
TX4MOD3	Mean value of the 8-day MODIS day-time LST time series data for Jun/Jul	1000	http://www.worldgrids.org/	1
TX5MOD3	Mean value of the 8-day MODIS day-time LST time series data for Aug/Sep	1000	http://www.worldgrids.org/	1
TX6MOD3	Mean value of the 8-day MODIS day-time LST time series data for Oct/Nov	1000	http://www.worldgrids.org/	1
PX1WCL3	Long-term precipitation for period Nov/Dec/Jan based on WorldClim.org data	1000	http://www.worldgrids.org/	1
PX2WCL3	Long-term precipitation for period Feb/Mar/Apr based on WorldClim.org data	1000	http://www.worldgrids.org/	1
PX3WCL3	Long-term precipitation for period May/Jun/Jul based on WorldClim.org data	1000	http://www.worldgrids.org/	1
PX4WCL3	Long-term precipitation for period Aug/Sep/Oct based on WorldClim.org data	1000	http://www.worldgrids.org/	1
DEMSRE3	Global Relief Model based on SRTM 30+ and ETOPO DEM at 1/120 arcdeegres	1000	http://www.worldgrids.org/	1
SLPSRT3	Slope map in percent derived using the DEMSRE3	1000	http://www.worldgrids.org/	1
L3POBI3	Physiographic landform units (SCALA project)	1000	http://www.worldgrids.org/	1
TWISRE3	SAGA Topographic Wetness Index derived using the DEMSRE3	1000	http://www.worldgrids.org/	1
OPISRE3	SAGA Topopgraphic Openess Index derived using the DEMSRE3	1000	http://www.worldgrids.org/	1
INMSRE3	Mean potential incoming solar radiation derived in SAGA GIS	1000	http://www.worldgrids.org/	1
INSSRE3	Standard deviation of the potential incoming solar radiation derived in SAGA GIS	1000	http://www.worldgrids.org/	1
MRVSRE3	Multi-resolution Index of Valley Bottom Flatness derived in SAGA GIS	1000	http://www.worldgrids.org/	1
EVMMOD3	Mean value of the monthly MODIS EVI time series data	1000	http://www.worldgrids.org/	1
EVSMOD3	Standard deviation of the monthly MODIS EVI time series data	1000	http://www.worldgrids.org/	1
LAMMOD3	Mean value of the 8-day MODIS LAI time series data	1000	http://www.worldgrids.org/	1
LASMOD3	Standard deviation of the 8-day MODIS LAI time series data	1000	http://www.worldgrids.org/	1
ETMNTS3	Long-term MODIS-estimated Evapotranspiration (MOD16)	1000	http://www.worldgrids.org/	1
GP1MOD3	First principal component of the MODIS yearly Gross Primary Productivity	1000	http://www.worldgrids.org/	1
GP2MOD3	Second principal component of the MODIS yearly Gross Primary Productivity	1000	http://www.worldgrids.org/	1
TA1MOD3	First principal component of the 8-day MODIS Thermal Anomalies & Fire images	1000	http://www.worldgrids.org/	1
TA2MOD3	Second principal component of the 8-day MODIS Thermal Anomalies & Fire images	1000	http://www.worldgrids.org/	1
L01IGB3	Evergreen needleleaf forest based on the MOD12Q1 product	1000	http://www.worldgrids.org/	0
L02IGB3	Evergreen broadleaf forest based on the MOD12Q1 product	1000	http://www.worldgrids.org/	0
L03IGB3	Deciduous needleleaf forest based on the MOD12Q1 product	1000	http://www.worldgrids.org/	0
L04IGB3	Deciduous broadleaf forest based on the MOD12Q1 product	1000	http://www.worldgrids.org/	0
L05IGB3	Mixed forests based on the MOD12Q1 product	1000	http://www.worldgrids.org/	0
L06IGB3	Closed shrublands based on the MOD12Q1 product	1000	http://www.worldgrids.org/	0
L09IGB3	Savannas based on the MOD12Q1 product	1000	http://www.worldgrids.org/	0
L10IGB3	Grasslands based on the MOD12Q1 product	1000	http://www.worldgrids.org/	0
L11IGB3	Permanent Wetlands based on the MOD12Q1 product	1000	http://www.worldgrids.org/	0
L12IGB3	Croplands based on the MOD12Q1 product	1000	http://www.worldgrids.org/	0
L13IGB3	Urban and built-up based on the MOD12Q1 product	1000	http://www.worldgrids.org/	0
L14IGB3	Cropland/natural vegetation mosaic based on the MOD12Q1 product	1000	http://www.worldgrids.org/	0
L15IGB3	Snow and ice based on the MOD12Q1 product	1000	http://www.worldgrids.org/	0
L16IGB3	Barren or sparsely vegetated based on the MOD12Q1 product	1000	http://www.worldgrids.org/	0
G01IGB3	Land cover types for 2001 based on the MODIS IGBP classes	1000	http://www.worldgrids.org/	0
G02IGB3	Land cover types for 2002 based on the MODIS IGBP classes	1000	http://www.worldgrids.org/	0
G04IGB3	Land cover types for 2004 based on the MODIS IGBP classes	1000	http://www.worldgrids.org/	0
G10IGB3	Land cover types for 2010 based on the MODIS IGBP classes	1000	http://www.worldgrids.org/	0
G11IGB3	Land cover types for 2011 based on the MODIS IGBP classes	1000	http://www.worldgrids.org/	0
G12IGB3	Land cover types for 2012 based on the MODIS IGBP classes	1000	http://www.worldgrids.org/	0
GLCESA3	Land Cover classes based on the MERIS FR images	1000	http://www.worldgrids.org/	1
G01ESA3	Post-flooding or irrigated croplands (or aquatic)	1000	http://www.worldgrids.org/	0
G02ESA3	Rainfed croplands	1000	http://www.worldgrids.org/	0
G03ESA3	Mosaic cropland (50-70%) / vegetation (grassland/shrubland/forest) (20-50%)	1000	http://www.worldgrids.org/	0
G04ESA3	Mosaic vegetation (grassland/shrubland/forest) (50-70%) / cropland (20-50%)	1000	http://www.worldgrids.org/	0
G05ESA3	Closed to open (>15%) broadleaved evergreen or semi-deciduous forest (>5m)	1000	http://www.worldgrids.org/	0
G06ESA3	Closed (>40%) broadleaved deciduous forest (>5m)	1000	http://www.worldgrids.org/	1
G07ESA3	Open (15-40%) broadleaved deciduous forest/woodland (>5m)	1000	http://www.worldgrids.org/	0
G08ESA3	Closed (>40%) needleleaved evergreen forest (>5m)	1000	http://www.worldgrids.org/	0
G09ESA3	Open (15-40%) needleleaved deciduous or evergreen forest (>5m)	1000	http://www.worldgrids.org/	0
G10ESA3	Closed to open (>15%) mixed broadleaved and needleleaved forest (>5m)	1000	http://www.worldgrids.org/	0
G11ESA3	Mosaic forest or shrubland (50-70%) / grassland (20-50%)	1000	http://www.worldgrids.org/	0
G14ESA3	Closed to open (>15%) (broadleaved or needleleaved, evergreen or deciduous) shrubland (<5m)	1000	http://www.worldgrids.org/	0
G15ESA3	Sparse (<15%) vegetation	1000	http://www.worldgrids.org/	0
G16ESA3	Closed to open (>15%) broadleaved forest regularly flooded (semi-permanently or temporarily) - Fresh or brackish water	1000	http://www.worldgrids.org/	0
G17ESA3	Closed (>40%) broadleaved forest or shrubland permanently flooded - Saline or brackish water	1000	http://www.worldgrids.org/	0
G18ESA3	Closed to open (>15%) grassland or woody vegetation on regularly flooded or waterlogged soil - Fresh, brackish or saline water	1000	http://www.worldgrids.org/	0
G19ESA3	Artificial surfaces and associated areas (Urban areas >50%)	1000	http://www.worldgrids.org/	0
G20ESA3	Bare areas	1000	http://www.worldgrids.org/	0
G21ESA3	Water bodies	1000	http://www.worldgrids.org/	0
G22ESA3	Permanent snow and ice	1000	http://www.worldgrids.org/	0
GLCJRC3	Global Land Cover map for the year 2000 (GLC2000)	1000	http://www.worldgrids.org/	1
GEAISG3	Geological ages based on the surface geology	1000	http://www.worldgrids.org/	1
GEMISG3	Dominant mineral types based on the surface geology	1000	http://www.worldgrids.org/	1
GACHWS3	Percent coverage Acrisols	1000	http://www.worldgrids.org/	0
GABHWS3	Percent coverage Albeluvisols	1000	http://www.worldgrids.org/	0
GANHWS3	Percent coverage Andosols	1000	http://www.worldgrids.org/	0
GARHWS3	Percent coverage Arenosols	1000	http://www.worldgrids.org/	1
GCLHWS3	Percent coverage Calcisols	1000	http://www.worldgrids.org/	0
GCMHWS3	Percent coverage Cambisols	1000	http://www.worldgrids.org/	1
GCHHWS3	Percent coverage Chernozems	1000	http://www.worldgrids.org/	0
GCRHWS3	Percent coverage Cryosols	1000	http://www.worldgrids.org/	0
GFRHWS3	Percent coverage Ferralsols	1000	http://www.worldgrids.org/	0
GFLHWS3	Percent coverage Fluvisols	1000	http://www.worldgrids.org/	1
GGLHWS3	Percent coverage Gleysols	1000	http://www.worldgrids.org/	0
GGYHWS3	Percent coverage Gypsisols	1000	http://www.worldgrids.org/	0
GHSHWS3	Percent coverage Histosols	1000	http://www.worldgrids.org/	0
GKSHWS3	Percent coverage Kastanozems	1000	http://www.worldgrids.org/	0
GLPHWS3	Percent coverage Leptosols	1000	http://www.worldgrids.org/	0
GPLHWS3	Percent coverage Planosols	1000	http://www.worldgrids.org/	0
GPTHWS3	Percent coverage Plinthosols	1000	http://www.worldgrids.org/	0
GPZHWS3	Percent coverage Podzols	1000	http://www.worldgrids.org/	0
GRGHWS3	Percent coverage Regosols	1000	http://www.worldgrids.org/	0
GSCHWS3	Percent coverage Solonchaks	1000	http://www.worldgrids.org/	0
GSNHWS3	Percent coverage Solonetz	1000	http://www.worldgrids.org/	0
GUMHWS3	Percent coverage Umbrisols	1000	http://www.worldgrids.org/	0
GVRHWS3	Percent coverage Vertisols	1000	http://www.worldgrids.org/	0
GALHWS3	Percent coverage Alisols	1000	http://www.worldgrids.org/	0
GATHWS3	Percent coverage Anthrosols	1000	http://www.worldgrids.org/	0
GSTHWS3	Percent coverage Stagnosols	1000	http://www.worldgrids.org/	0
GACGEM	Global accessibility map	1000	http://www.worldgrids.org/	1
P01DWD1	Monthly precipitation for January	5000	http://www.worldgrids.org/	1
P02DWD1	Monthly precipitation for February	5000	http://www.worldgrids.org/	1
P03DWD1	Monthly precipitation for March	5000	http://www.worldgrids.org/	1
P04DWD1	Monthly precipitation for April	5000	http://www.worldgrids.org/	1
P05DWD1	Monthly precipitation for May	5000	http://www.worldgrids.org/	1
P06DWD1	Monthly precipitation for June	5000	http://www.worldgrids.org/	1
P07DWD1	Monthly precipitation for July	5000	http://www.worldgrids.org/	1
P08DWD1	Monthly precipitation for August	5000	http://www.worldgrids.org/	1
P09DWD1	Monthly precipitation for September	5000	http://www.worldgrids.org/	1
P10DWD1	Monthly precipitation for October	5000	http://www.worldgrids.org/	1
P11DWD1	Monthly precipitation for November	5000	http://www.worldgrids.org/	1
P12DWD1	Monthly precipitation for December	5000	http://www.worldgrids.org/	1
PREGSM1	Mean monthly precipitation (annual)	5000	http://www.worldgrids.org/	1
SMKMOD1	MODIS LAI based soil productive area mask of the world	5000	http://www.worldgrids.org/	0
PDMGPW1	Average population density 1990-2015	5000	http://www.worldgrids.org/	1
Note: The name, description, resolution, source and selected (1 means the covariates we ultimately used, 0 means covariates we removed temporarily)
